# Supplementary material
Source: publisher figshare collection journal article supplement (https://karger.figshare.com/ndownloader/files/29242950)
Supplement: Supplementary file 1 [file 29242950]

**Supplement 1 Search strategies used in Pubmed**

Search: (((((((((((((((((((((nasal packing[Title/Abstract]) AND (endoscopic sinus surgery)) AND (wound healing)) OR (no nasal packing)) OR (absorbable packing)) OR (adhesion)) OR (synechiae)) AND (randomized)) OR (absorbable packing)) OR (adhesion)) OR (synechiae)) AND (randomized))) AND (endoscopic)) AND (postoperative)) NOT (cancer)) NOT (tumor)) NOT (meta)) NOT (stent)) NOT (review))) NOT (systematic review) )) NOT (animal)

((((((((((("nasal packing"[Title/Abstract] AND (("endoscope s"[All Fields] OR "endoscoped"[All Fields] OR "endoscopes"[MeSH Terms] OR "endoscopes"[All Fields] OR "endoscope"[All Fields] OR "endoscopical"[All Fields] OR "endoscopically"[All Fields] OR "endoscopy"[MeSH Terms] OR "endoscopy"[All Fields] OR "endoscopic"[All Fields]) AND ("paranasal sinuses"[MeSH Terms] OR ("paranasal"[All Fields] AND "sinuses"[All Fields]) OR "paranasal sinuses"[All Fields] OR "sinus"[All Fields] OR "sinus s"[All Fields]) AND ("surgery"[MeSH Subheading] OR "surgery"[All Fields] OR "surgical procedures, operative"[MeSH Terms] OR ("surgical"[All Fields] AND "procedures"[All Fields] AND "operative"[All Fields]) OR "operative surgical procedures"[All Fields] OR "general surgery"[MeSH Terms] OR ("general"[All Fields] AND "surgery"[All Fields]) OR "general surgery"[All Fields] OR "surgery s"[All Fields] OR "surgerys"[All Fields] OR "surgeries"[All Fields])) AND ("wound healing"[MeSH Terms] OR ("wound"[All Fields] AND "healing"[All Fields]) OR "wound healing"[All Fields])) OR (("nasalance"[All Fields] OR "nasality"[All Fields] OR "nasalization"[All Fields] OR "nasalized"[All Fields] OR "nasally"[All Fields] OR "nose"[MeSH Terms] OR "nose"[All Fields] OR "nasal"[All Fields] OR "nasals"[All Fields]) AND ("packed"[All Fields] OR "packing"[All Fields] OR "packings"[All Fields])) OR (("absorb"[All Fields] OR "absorbabilities"[All Fields] OR "absorbability"[All Fields] OR "absorbable"[All Fields] OR "absorbables"[All Fields] OR "absorbance"[All Fields] OR "absorbances"[All Fields] OR "absorbancies"[All Fields] OR "absorbancy"[All Fields] OR "absorbant"[All Fields] OR "absorbants"[All Fields] OR "absorbe"[All Fields] OR "absorbed"[All Fields] OR "absorbence"[All Fields] OR "absorbencies"[All Fields] OR "absorbency"[All Fields] OR "absorbent"[All Fields] OR "absorbents"[All Fields] OR "absorber"[All Fields] OR "absorber s"[All Fields] OR "absorbers"[All Fields] OR "absorbing"[All Fields] OR "absorbs"[All Fields]) AND ("packed"[All Fields] OR "packing"[All Fields] OR "packings"[All Fields])) OR ("adhese"[All Fields] OR "adhesion"[All Fields] OR "adhesions"[All Fields] OR "adhesive s"[All Fields] OR "adhesively"[All Fields] OR "adhesiveness"[MeSH Terms] OR "adhesiveness"[All Fields] OR "adhesivenesses"[All Fields] OR "adhesives"[Pharmacological Action] OR "adhesives"[MeSH Terms] OR "adhesives"[All Fields] OR "adhesive"[All Fields] OR "adhesivities"[All Fields] OR "adhesivity"[All Fields]) OR ("synechia"[All Fields] OR "synechiae"[All Fields] OR "synechiaes"[All Fields] OR "synechias"[All Fields])) AND ("random allocation"[MeSH Terms] OR ("random"[All Fields] AND "allocation"[All Fields]) OR "random allocation"[All Fields] OR "random"[All Fields] OR "randomization"[All Fields] OR "randomized"[All Fields] OR "randomisation"[All Fields] OR "randomisations"[All Fields] OR "randomise"[All Fields] OR "randomised"[All Fields] OR "randomising"[All Fields] OR "randomizations"[All Fields] OR "randomize"[All Fields] OR "randomizes"[All Fields] OR "randomizing"[All Fields] OR "randomness"[All Fields] OR "randoms"[All Fields])) OR (("absorb"[All Fields] OR "absorbabilities"[All Fields] OR "absorbability"[All Fields] OR "absorbable"[All Fields] OR "absorbables"[All Fields] OR "absorbance"[All Fields] OR "absorbances"[All Fields] OR "absorbancies"[All Fields] OR "absorbancy"[All Fields] OR "absorbant"[All Fields] OR "absorbants"[All Fields] OR "absorbe"[All Fields] OR "absorbed"[All Fields] OR "absorbence"[All Fields] OR "absorbencies"[All Fields] OR "absorbency"[All Fields] OR "absorbent"[All Fields] OR "absorbents"[All Fields] OR "absorber"[All Fields] OR "absorber s"[All Fields] OR "absorbers"[All Fields] OR "absorbing"[All Fields] OR "absorbs"[All Fields]) AND ("packed"[All Fields] OR "packing"[All Fields] OR "packings"[All Fields])) OR ("adhese"[All Fields] OR "adhesion"[All Fields] OR "adhesions"[All Fields] OR "adhesive s"[All Fields] OR "adhesively"[All Fields] OR "adhesiveness"[MeSH Terms] OR "adhesiveness"[All Fields] OR "adhesivenesses"[All Fields] OR "adhesives"[Pharmacological Action] OR "adhesives"[MeSH Terms] OR "adhesives"[All Fields] OR "adhesive"[All Fields] OR "adhesivities"[All Fields] OR "adhesivity"[All Fields]) OR ("synechia"[All Fields] OR "synechiae"[All Fields] OR "synechiaes"[All Fields] OR "synechias"[All Fields])) AND ("random allocation"[MeSH Terms] OR ("random"[All Fields] AND "allocation"[All Fields]) OR "random allocation"[All Fields] OR "random"[All Fields] OR "randomization"[All Fields] OR "randomized"[All Fields] OR "randomisation"[All Fields] OR "randomisations"[All Fields] OR "randomise"[All Fields] OR "randomised"[All Fields] OR "randomising"[All Fields] OR "randomizations"[All Fields] OR "randomize"[All Fields] OR "randomizes"[All Fields] OR "randomizing"[All Fields] OR "randomness"[All Fields] OR "randoms"[All Fields]) AND ("endoscope s"[All Fields] OR "endoscoped"[All Fields] OR "endoscopes"[MeSH Terms] OR "endoscopes"[All Fields] OR "endoscope"[All Fields] OR "endoscopical"[All Fields] OR "endoscopically"[All Fields] OR "endoscopy"[MeSH Terms] OR "endoscopy"[All Fields] OR "endoscopic"[All Fields]) AND ("postoperative period"[MeSH Terms] OR ("postoperative"[All Fields] AND "period"[All Fields]) OR "postoperative period"[All Fields] OR "postop"[All Fields] OR "postoperative"[All Fields] OR "postoperatively"[All Fields] OR "postoperatives"[All Fields])) NOT ("cancer s"[All Fields] OR "cancerated"[All Fields] OR "canceration"[All Fields] OR "cancerization"[All Fields] OR "cancerized"[All Fields] OR "cancerous"[All Fields] OR "neoplasms"[MeSH Terms] OR "neoplasms"[All Fields] OR "cancer"[All Fields] OR "cancers"[All Fields])) NOT ("cysts"[MeSH Terms] OR "cysts"[All Fields] OR "cyst"[All Fields] OR "neurofibroma"[MeSH Terms] OR "neurofibroma"[All Fields] OR "neurofibromas"[All Fields] OR "tumor s"[All Fields] OR "tumoral"[All Fields] OR "tumorous"[All Fields] OR "tumour"[All Fields] OR "neoplasms"[MeSH Terms] OR "neoplasms"[All Fields] OR "tumor"[All Fields] OR "tumour s"[All Fields] OR "tumoural"[All Fields] OR "tumourous"[All Fields] OR "tumours"[All Fields] OR "tumors"[All Fields])) NOT ("meta"[Journal] OR "meta"[All Fields])) NOT ("stent s"[All Fields] OR "stentings"[All Fields] OR "stents"[MeSH Terms] OR "stents"[All Fields] OR "stent"[All Fields] OR "stented"[All Fields] OR "stenting"[All Fields])) NOT ("review"[Publication Type] OR "review literature as topic"[MeSH Terms] OR "review"[All Fields])) NOT ("systematic review"[Publication Type] OR "systematic reviews as topic"[MeSH Terms] OR "systematic review"[All Fields])) NOT ("animals"[MeSH Terms:noexp] OR "animal"[All Fields])

Translations

endoscopic: "endoscope's"[All Fields] OR "endoscoped"[All Fields] OR "endoscopes"[MeSH Terms] OR "endoscopes"[All Fields] OR "endoscope"[All Fields] OR "endoscopical"[All Fields] OR "endoscopically"[All Fields] OR "endoscopy"[MeSH Terms] OR "endoscopy"[All Fields] OR "endoscopic"[All Fields]

sinus: "paranasal sinuses"[MeSH Terms] OR ("paranasal"[All Fields] AND "sinuses"[All Fields]) OR "paranasal sinuses"[All Fields] OR "sinus"[All Fields] OR "sinus's"[All Fields]

surgery: "surgery"[Subheading] OR "surgery"[All Fields] OR "surgical procedures, operative"[MeSH Terms] OR ("surgical"[All Fields] AND "procedures"[All Fields] AND "operative"[All Fields]) OR "operative surgical procedures"[All Fields] OR "general surgery"[MeSH Terms] OR ("general"[All Fields] AND "surgery"[All Fields]) OR "general surgery"[All Fields] OR "surgery's"[All Fields] OR "surgerys"[All Fields] OR "surgeries"[All Fields]

wound healing: "wound healing"[MeSH Terms] OR ("wound"[All Fields] AND "healing"[All Fields]) OR "wound healing"[All Fields]

nasal: "nasalance"[All Fields] OR "nasality"[All Fields] OR "nasalization"[All Fields] OR "nasalized"[All Fields] OR "nasally"[All Fields] OR "nose"[MeSH Terms] OR "nose"[All Fields] OR "nasal"[All Fields] OR "nasals"[All Fields]

packing: "packed"[All Fields] OR "packing"[All Fields] OR "packings"[All Fields]

absorbable: "absorb"[All Fields] OR "absorbabilities"[All Fields] OR "absorbability"[All Fields] OR "absorbable"[All Fields] OR "absorbables"[All Fields] OR "absorbance"[All Fields] OR "absorbances"[All Fields] OR "absorbancies"[All Fields] OR "absorbancy"[All Fields] OR "absorbant"[All Fields] OR "absorbants"[All Fields] OR "absorbe"[All Fields] OR "absorbed"[All Fields] OR "absorbence"[All Fields] OR "absorbencies"[All Fields] OR "absorbency"[All Fields] OR "absorbent"[All Fields] OR "absorbents"[All Fields] OR "absorber"[All Fields] OR "absorber's"[All Fields] OR "absorbers"[All Fields] OR "absorbing"[All Fields] OR "absorbs"[All Fields]

packing: "packed"[All Fields] OR "packing"[All Fields] OR "packings"[All Fields]

adhesion: "adhese"[All Fields] OR "adhesion"[All Fields] OR "adhesions"[All Fields] OR "adhesive's"[All Fields] OR "adhesively"[All Fields] OR "adhesiveness"[MeSH Terms] OR "adhesiveness"[All Fields] OR "adhesivenesses"[All Fields] OR "adhesives"[Pharmacological Action] OR "adhesives"[MeSH Terms] OR "adhesives"[All Fields] OR "adhesive"[All Fields] OR "adhesivities"[All Fields] OR "adhesivity"[All Fields]

synechiae: "synechia"[All Fields] OR "synechiae"[All Fields] OR "synechiaes"[All Fields] OR "synechias"[All Fields]

randomized: "random allocation"[MeSH Terms] OR ("random"[All Fields] AND "allocation"[All Fields]) OR "random allocation"[All Fields] OR "random"[All Fields] OR "randomization"[All Fields] OR "randomized"[All Fields] OR "randomisation"[All Fields] OR "randomisations"[All Fields] OR "randomise"[All Fields] OR "randomised"[All Fields] OR "randomising"[All Fields] OR "randomizations"[All Fields] OR "randomize"[All Fields] OR "randomizes"[All Fields] OR "randomizing"[All Fields] OR "randomness"[All Fields] OR "randoms"[All Fields]

absorbable: "absorb"[All Fields] OR "absorbabilities"[All Fields] OR "absorbability"[All Fields] OR "absorbable"[All Fields] OR "absorbables"[All Fields] OR "absorbance"[All Fields] OR "absorbances"[All Fields] OR "absorbancies"[All Fields] OR "absorbancy"[All Fields] OR "absorbant"[All Fields] OR "absorbants"[All Fields] OR "absorbe"[All Fields] OR "absorbed"[All Fields] OR "absorbence"[All Fields] OR "absorbencies"[All Fields] OR "absorbency"[All Fields] OR "absorbent"[All Fields] OR "absorbents"[All Fields] OR "absorber"[All Fields] OR "absorber's"[All Fields] OR "absorbers"[All Fields] OR "absorbing"[All Fields] OR "absorbs"[All Fields]

packing: "packed"[All Fields] OR "packing"[All Fields] OR "packings"[All Fields]

adhesion: "adhese"[All Fields] OR "adhesion"[All Fields] OR "adhesions"[All Fields] OR "adhesive's"[All Fields] OR "adhesively"[All Fields] OR "adhesiveness"[MeSH Terms] OR "adhesiveness"[All Fields] OR "adhesivenesses"[All Fields] OR "adhesives"[Pharmacological Action] OR "adhesives"[MeSH Terms] OR "adhesives"[All Fields] OR "adhesive"[All Fields] OR "adhesivities"[All Fields] OR "adhesivity"[All Fields]

synechiae: "synechia"[All Fields] OR "synechiae"[All Fields] OR "synechiaes"[All Fields] OR "synechias"[All Fields]

randomized: "random allocation"[MeSH Terms] OR ("random"[All Fields] AND "allocation"[All Fields]) OR "random allocation"[All Fields] OR "random"[All Fields] OR "randomization"[All Fields] OR "randomized"[All Fields] OR "randomisation"[All Fields] OR "randomisations"[All Fields] OR "randomise"[All Fields] OR "randomised"[All Fields] OR "randomising"[All Fields] OR "randomizations"[All Fields] OR "randomize"[All Fields] OR "randomizes"[All Fields] OR "randomizing"[All Fields] OR "randomness"[All Fields] OR "randoms"[All Fields]

endoscopic: "endoscope's"[All Fields] OR "endoscoped"[All Fields] OR "endoscopes"[MeSH Terms] OR "endoscopes"[All Fields] OR "endoscope"[All Fields] OR "endoscopical"[All Fields] OR "endoscopically"[All Fields] OR "endoscopy"[MeSH Terms] OR "endoscopy"[All Fields] OR "endoscopic"[All Fields]

postoperative: "postoperative period"[MeSH Terms] OR ("postoperative"[All Fields] AND "period"[All Fields]) OR "postoperative period"[All Fields] OR "postop"[All Fields] OR "postoperative"[All Fields] OR "postoperatively"[All Fields] OR "postoperatives"[All Fields]

cancer: "cancer's"[All Fields] OR "cancerated"[All Fields] OR "canceration"[All Fields] OR "cancerization"[All Fields] OR "cancerized"[All Fields] OR "cancerous"[All Fields] OR "neoplasms"[MeSH Terms] OR "neoplasms"[All Fields] OR "cancer"[All Fields] OR "cancers"[All Fields]

tumor: "cysts"[MeSH Terms] OR "cysts"[All Fields] OR "cyst"[All Fields] OR "neurofibroma"[MeSH Terms] OR "neurofibroma"[All Fields] OR "neurofibromas"[All Fields] OR "tumor's"[All Fields] OR "tumoral"[All Fields] OR "tumorous"[All Fields] OR "tumour"[All Fields] OR "neoplasms"[MeSH Terms] OR "neoplasms"[All Fields] OR "tumor"[All Fields] OR "tumour's"[All Fields] OR "tumoural"[All Fields] OR "tumourous"[All Fields] OR "tumours"[All Fields] OR "tumors"[All Fields]

meta: "Meta"[Journal:__jid100969545] OR "meta"[All Fields]

stent: "stent's"[All Fields] OR "stentings"[All Fields] OR "stents"[MeSH Terms] OR "stents"[All Fields] OR "stent"[All Fields] OR "stented"[All Fields] OR "stenting"[All Fields]

review: "review"[Publication Type] .or. "review literature as topic"[MeSH Terms] .or. "review"[All Fields]

systematic review: "systematic review"[Publication Type] .or. "systematic reviews as topic"[MeSH Terms] .or. "systematic review"[All Fields]

animal: "animals"[MeSH Terms:noexp] OR animal[All Fields]
